# Supplementary material
Source: publisher site journal article supplement (https://www.dovepress.com/article/391608)
Supplement: Supplementary file 1 [file get_supplementary_file.php]

**แนวทางการวินิจฉัยภาวะสมองเสื่อม**  
**Thai Mental State Examination (TMSE)**

NAME ชื่อ..... Gender เพศ..... AGE อายุ..... HN.....

- 1. ORIENTATION (6 คะแนน)** (Patient's score) **คะแนน**
- (1) วันนี้ เป็นวันอะไรของสัปดาห์(จันทร์ อังคาร พุธ พฤหัส ฯลฯ) What is the current day? (Monday, Tuesday, etc.) .....
- (1) วันนี้ วันที่เท่าไร What is the current date? .....
- (1) เดือนนี้ เดือนอะไร What is the current month? .....
- (1) ขณะนี้เป็นช่วงเวลาไหนของวัน (เช้า เที่ยง บ่าย เย็น)What is the current part of the day? (Morning, noon, afternoon, etc.).....
- (1) ที่นี้ที่ไหน (บริเวณที่ตรวจ) Where are we now? (Examination area) .....
- (1) คนที่เห็นในภาพนี้มีอาชีพอะไร (ภาพอยู่ด้านหลัง) Please identify the occupation of the person in picture (In the next page).....

**2. REGISTRATION (3 คะแนน)**

ผู้ทดสอบบอกชื่อของ 3 อย่าง โดยพูดห่างกัน ครั้งละ 1 วินาที เพียงครั้งเดียว The examiner names 3 objects (tree, car, hand), one time in a second apart between each word. And ask the patient to repeat all 3 words.

แล้วจึงให้ผู้ถูกทดสอบบอกให้ครบ ตามที่ผู้ทดสอบบอกในครั้งแรก

☐ (1) ต้นไม้ Tree ☐ (1) รถยนต์ Car ☐ (1) มือ Hand .....

\*หมายเหตุ หลังจากให้คะแนนแล้วให้บอกซ้ำจนผู้ถูกทดสอบจำได้ และบอกให้ผู้ถูกทดสอบทราบว่าอีกสักครู่นี้จะกลับมาถามใหม่  
NOTE. After scoring, the examiner repeats these three words until the patient can remember all of them.

**3. ATTENTION (5 คะแนน)**

ให้บอกวันอาทิตย์ - วันเสาร์ ย้อนหลัง ให้ครบสัปดาห์ Please tell me five weekdays in backward, starting from the day before Saturday.

☐ (1) ศุกร์ ☐ (1) พฤหัสบดี ☐ (1) พุธ ☐ (1) อังคาร ☐ (1) จันทร์ .....

**4. CALCULATION (3 คะแนน)** Please count backward from a hundred by seven, for three times.

ให้คำนวณ 100-7 ไปเรื่อย ๆ 3 ครั้ง (ให้ 1 คะแนน ในแต่ละครั้งที่ตอบถูก ใช้เวลาคิดในแต่ละช่วงคำตอบไม่เกิน 1 นาที)

ถ้าผู้ถูกทดสอบไม่ตอบคำถามที่ 1 ให้ตั้งเลข 93-7 ลงงาในการคำนวณครั้งต่อไป และ 86-7 ในครั้งสุดท้ายตามลำดับ

☐ (1) 100-7 ☐ (1) 93-7 ☐ (1) 86-7 .....

**5. LANGUAGE (10 คะแนน)** Point to the examiner's wristwatch and clothes, and ask the patient to name them.

(1) ผู้ทดสอบชี้ไปที่นาฬิกาข้อมือ แล้วถามผู้ถูกทดสอบว่าโดยทั่วไป "เราเรียกสิ่งนี้ว่าอะไร" (นาฬิกา) (Wristwatch) .....

(1) ผู้ทดสอบชี้ไปที่เสื้อผ้าของตนเอง แล้วถามผู้ถูกทดสอบว่าโดยทั่วไป "เราเรียกสิ่งนี้ว่าอะไร" (เสื้อผ้า) (Clothes) .....

(1) ผู้ทดสอบบอกผู้ถูกทดสอบให้ตั้งใจฟังประโยคต่อไปนี้ให้ดี แล้วจำไว้ จากนั้นให้พูดตาม

"ยายพาหลานไปซื้อขนมที่ตลาด" Ask the patient to remember this sentence, and repeat it.  
"Grandmother brought her grandchild to the market to buy snacks". .....

จงทำตามคำสั่งต่อไปนี้ (มี 3 ขั้นตอนคำสั่ง) ให้ผู้ทดสอบพูดต่อกันไปให้ครบประโยคทั้ง 3 ขั้นตอน

"หยิบกระดาษด้วยมือขวา พับกระดาษเป็นครึ่งแผ่น แล้วส่งกระดาษให้ผู้ตรวจ" Ask the patient to follow these instructions: 'Take the paper with your right hand, fold it in a half, and give it back to me'.

(1) หยิบกระดาษด้วยมือขวา Take the paper with right hand. ....

(1) พับกระดาษเป็นครึ่งแผ่น Fold the paper in a half. ....

(1) ส่งกระดาษให้ผู้ตรวจ Give the paper back to the examiner. ....

(1) ให้ผู้ถูกทดสอบอ่านแล้วทำตามคำสั่ง "หัดบด" (ข้อความอยู่ด้านหลัง) Ask the patient to read the written instruction in the next page and do it. ....

(2) จงวาดภาพต่อไปนี้ให้เหมือนตัวอย่างมากที่สุด เท่าที่ท่านจะสามารถทำได้ (ภาพอยู่ด้านหลัง) Ask the patient to copy the picture in the next page. ....

(1) กล้ายกับส้ม เหมือนกันคือเป็นผลไม้ แล้วแมวกับสุนัขเหมือนกันคือ What is the similarity between the cat and the dog? .....

(เป็นสัตว์, เป็นสิ่งมีชีวิต)

**6. RECALL (3 คะแนน)**

สิ่งของ 3 อย่างที่บอกให้จำเมื่อสักครู่นี้ มื่อะไรบ้าง Tell the patient to recall the 3 things that were told earlier.

☐ (1) ต้นไม้ Tree ☐ (1) รถยนต์ Car ☐ (1) มือ Hand .....

ภาวะสมองเสื่อม คะแนน  $\leq 23$

CUT-OFF point of cognitive impairment : scores  $\leq 23$

รวมคะแนน

Total scores

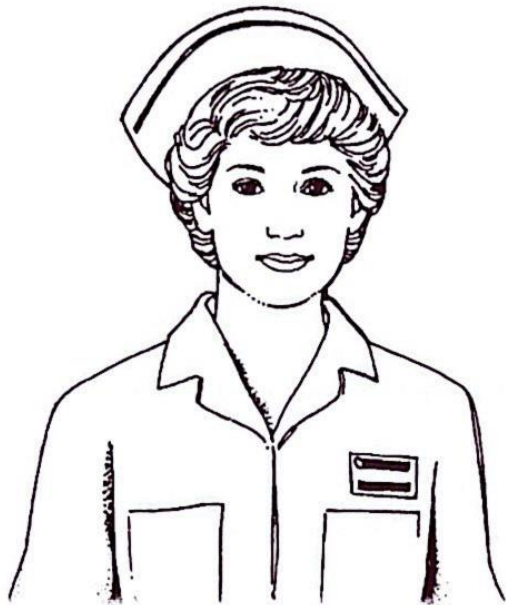

Please identify the occupation of this person.

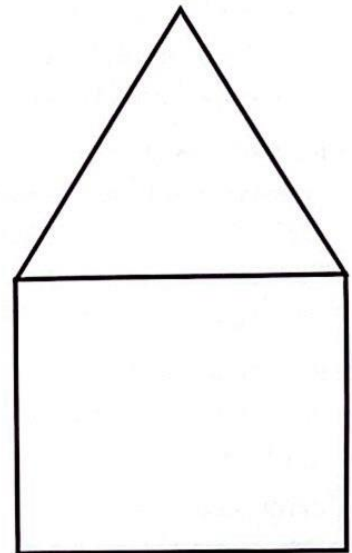

Ask the patient to copy this picture.

# “หลับตา”

Written instruction: 'close your eyes'.
